# Supplementary material for: Phytochemical Characterization, Antioxidant and Anti-Proliferative Properties of Rubia cordifolia L. Extracts Prepared with Improved Extraction Conditions
Source: MDPI journal article supplement (doi:10.3390/antiox11051006), 2022-05-20
Supplement: s1 [file s1]

### Supplementary Data

**Table S1.** UPLC-UV-MS identification of possible compounds from *Rubia cordifolia* Linn. root extract prepared in methanol. ID source: DBSearch.

| No. | Name                         | Formula   | Score | Mass     | CAS        | RT     |
|-----|------------------------------|-----------|-------|----------|------------|--------|
| 1   | Ricinoleic acid              | C18H34O3  | 99.67 | 298.2507 | 5323-95-5  | 15.677 |
| 2   | Armevavine                   | C19H23NO3 | 99.54 | 313.168  | 524-20-9   | 16.405 |
| 3   | Erysotrine                   | C19H23NO3 | 99.54 | 313.168  | 27740-43-8 | 16.405 |
| 4   | Ethylmorphine                | C19H23NO3 | 99.54 | 313.168  | 76-58-4    | 16.405 |
| 5   | Laurifine                    | C19H23NO3 | 99.54 | 313.168  | 56261-28-0 | 16.405 |
| 6   | Cryptotanshinone             | C19H23O3  | 99.53 | 296.1415 | 35825-57-1 | 16.405 |
| 7   | 5-Deoxystrigol               | C19H22O5  | 99.46 | 330.1468 |            | 11.167 |
| 8   | Gibberellin A5               | C19H22O5  | 99.46 | 330.1468 |            | 11.167 |
| 9   | Gibberellin A51-catabolite   | C19H22O5  | 99.46 | 330.1468 |            | 11.167 |
| 10  | Gibberellin A7               | C19H22O5  | 99.46 | 330.1468 |            | 11.167 |
| 11  | Podolide                     | C19H22O5  | 99.46 | 330.1468 | 55786-36-2 | 11.167 |
| 12  | Cyperine                     | C15H16O4  | 99.35 | 260.1051 | 33716-82-4 | 14.45  |
| 13  | Hemigossypol                 | C15H16O4  | 99.35 | 260.1051 |            | 14.45  |
| 14  | Homobaldrinal                | C15H16O4  | 99.35 | 260.1051 | 67910-07-0 | 14.45  |
| 15  | Linderane                    | C15H16O4  | 99.35 | 260.1051 | 13476-25-0 | 14.45  |
| 16  | Pergillin                    | C15H16O4  | 99.35 | 260.1051 | 74798-20-2 | 14.45  |
| 17  | Arachidic acid               | C20H40O2  | 99.23 | 312.303  | 506-30-9   | 17.781 |
| 18  | Phytanic acid                | C20H40O2  | 99.23 | 312.303  | 14721-66-5 | 17.781 |
| 19  | 1,3,6,8-Naphthalenetetrol    | C10H8O4   | 99.14 | 192.0424 | 18512-30-6 | 9.736  |
| 20  | 3,4-Dehydro-6-hydroxymellein | C10H8O4   | 99.14 | 192.0424 |            | 9.736  |
| 21  | Acamelin                     | C10H8O4   | 99.14 | 192.0424 | 74161-27-6 | 9.736  |
| 22  | Anemonin                     | C10H8O4   | 99.14 | 192.0424 | 508-44-1   | 9.736  |
| 23  | Isoscopoletin                | C10H8O4   | 99.14 | 192.0424 | 776-86-3   | 9.736  |
| 24  | Naphthazarin                 | C10H8O4   | 99.14 | 192.0424 | 475-38-7   | 9.736  |
| 25  | Scopoletin                   | C10H8O4   | 99.14 | 192.0424 | 92-61-5    | 9.736  |
| 26  | Butyl octadecanoate          | C22H44O2  | 99.03 | 340.3344 | 123-95-5   | 19.394 |
| 27  | Docosanoic acid              | C22H44O2  | 99.03 | 340.3344 | 112-85-6   | 19.394 |
| 28  | 2,3-Pentanedione             | C5H8O2    | 98.96 | 100.0524 | 600-14-6   | 2.174  |
| 29  | 3-Methylbutyrolactone        | C5H8O2    | 98.96 | 100.0524 | 1679-49-8  | 2.174  |
| 30  | 5-Aminopentanoic acid        | C5H11NO2  | 98.96 | 117.079  | 660-88-8   | 2.174  |
| 31  | L-Valine                     | C5H11NO2  | 98.96 | 117.079  | 72-18-4    | 2.174  |
| 32  | Norvaline                    | C5H11NO2  | 98.96 | 117.079  | 760-78-1   | 2.174  |
| 33  | Tiglic acid                  | C5H8O2    | 98.96 | 100.0524 | 80-59-1    | 2.174  |
| 34  | Valine                       | C5H11NO2  | 98.96 | 117.079  | 516-06-3   | 2.174  |
| 35  | Bombykol                     | C16H33O   | 98.58 | 238.2294 |            | 21.808 |
| 36  | 1-Acetoxy-pinorexinol        | C22H24O8  | 98.51 | 416.1474 | 81426-14-4 | 10.817 |
| 37  | Lophotoxin                   | C22H24O8  | 98.51 | 416.1474 | 78697-56-0 | 10.817 |

|    |                                  |              |       |          |            |        |
|----|----------------------------------|--------------|-------|----------|------------|--------|
| 38 | (S)-2-Methylbutanal              | C5H10O       | 98.06 | 86.0729  | 1730-97-8  | 0.929  |
| 39 | 1-Penten-3-ol                    | C5H10O       | 98.06 | 86.0729  | 616-25-1   | 0.929  |
| 40 | 2-Methylbutanal                  | C5H10O       | 98.06 | 86.0729  | 96-17-3    | 0.929  |
| 41 | Cyclopentanol                    | C5H10O       | 98.06 | 86.0729  | 96-41-3    | 0.929  |
| 42 | pentan-2-one                     | C5H10O       | 98.06 | 86.0729  |            | 0.929  |
| 43 | Stearic acid                     | C18H39O2     | 98.04 | 284.2718 | 57-11-4    | 16.174 |
| 44 | Aspulvinone E                    | C17H15O5     | 98    | 296.0687 | 49637-60-7 | 11.387 |
| 45 | Melicopine                       | C17H15NO5    | 98    | 313.0952 | 568-01-4   | 11.387 |
| 46 | Butyl dodecanoate                | C16H32O2     | 97.45 | 256.241  | 106-18-3   | 14.591 |
| 47 | Octyl octanoate                  | C16H32O2     | 97.45 | 256.241  | 2306-88-9  | 14.591 |
| 48 | Palmitic acid                    | C16H32O2     | 97.45 | 256.241  | 57-10-3    | 14.591 |
| 49 | Decyl butanoate                  | C14H28O2     | 97.43 | 228.2089 | 01-09-54   | 12.986 |
| 50 | Dicumarol                        | C19H15O6     | 97.43 | 336.0639 | 66-76-2    | 13.541 |
| 51 | Myristic acid                    | C14H28O2     | 97.43 | 228.2089 | 544-63-8   | 12.986 |
| 52 | Tetracenomycin D1                | C19H15O6     | 97.43 | 336.0639 |            | 13.541 |
| 53 | Protodioscin                     | C51H84O22    | 97.2  | 1048.547 | 55056-80-9 | 11.356 |
| 54 | Trigonelloside C                 | C51H84O22    | 97.2  | 1048.547 | 60478-69-5 | 11.356 |
| 55 | Cubebin                          | C20H20O6     | 97.08 | 356.1264 | 18423-69-3 | 10.838 |
| 56 | Kievitone                        | C20H20O6     | 97.08 | 356.1264 |            | 10.838 |
| 57 | Leachianone G                    | C20H20O6     | 97.08 | 356.1264 |            | 10.838 |
| 58 | Plaunol B                        | C20H20O6     | 97.08 | 356.1264 | 69749-00-4 | 10.838 |
| 59 | alpha-Irone                      | C14H22O      | 96.98 | 206.1665 | 79-69-6    | 1.221  |
| 60 | 1-Cyclohexene<br>carboxylic acid | C7H10O2      | 96.55 | 126.0683 | 636-82-8   | 1.085  |
| 61 | L-Thyronine                      | C15 H15 N O4 | 94.66 | 273.1012 | 1596-67-4  | 7.863  |
| 62 | Angustine                        | C20H15N3O    | 94.5  | 313.1204 | 40041-96-1 | 11.167 |
| 63 | Ochotensine                      | C21H21NO4    | 92.77 | 351.1473 | 4959-88-0  | 11.532 |
| 64 | Caseadine                        | C20H23NO4    | 92.2  | 341.1632 | 34413-12-2 | 9.115  |
| 65 | Isocorydine(+)                   | C20H23NO4    | 92.2  | 341.1632 | 475-67-2   | 9.115  |
| 66 | (-)-Phaseollinisoflavan          | C20H20O4     | 92.16 | 324.1367 |            | 9.115  |
| 67 | Glabranin                        | C20H20O4     | 92.16 | 324.1367 |            | 9.115  |
| 68 | Glabridin                        | C20H20O4     | 92.16 | 324.1367 |            | 9.115  |
| 69 | Isobavachalcone                  | C20H20O4     | 92.16 | 324.1367 |            | 9.115  |
| 70 | Moracin I                        | C20H20O4     | 92.16 | 324.1367 | 73338-88-2 | 9.115  |
| 71 | Otobain                          | C20H20O4     | 92.16 | 324.1367 | 3738-01-0  | 9.115  |
| 72 | Spathelia bischromene            | C20H20O4     | 92.16 | 324.1367 | 34411-93-3 | 9.115  |
| 73 | Cleomiscosin A                   | C20H18O8     | 91.42 | 386.102  | 76948-72-6 | 11.946 |
| 74 | Daphneticin                      | C20H18O8     | 91.42 | 386.102  | 83327-22-4 | 11.946 |
| 75 | Diferulic acid                   | C20H18O8     | 91.42 | 386.102  | 436-96-4   | 11.946 |
| 76 | Irisflorentin                    | C20H18O8     | 91.42 | 386.102  |            | 11.946 |
| 77 | (-)-8-<br>Demethylmaritidine     | C16H19NO3    | 86.45 | 273.1364 |            | 14.91  |
| 78 | 4'-O-<br>Methylnorbelladine      | C16H19NO3    | 86.45 | 273.1364 |            | 14.91  |

|     |                               |            |       |          |            |        |
|-----|-------------------------------|------------|-------|----------|------------|--------|
| 79  | 7,4'-Dihydroxy-8-methylflavan | C16H16O3   | 86.45 | 256.1098 |            | 14.91  |
| 80  | Broussin                      | C16H16O3   | 86.45 | 256.1098 |            | 14.91  |
| 81  | Lunacrine                     | C16H19NO3  | 86.45 | 273.1364 | 82-40-6    | 14.91  |
| 82  | Orchinol                      | C16H16O3   | 86.45 | 256.1098 | 41060-20-2 | 14.91  |
| 83  | Pterostilbene                 | C16H16O3   | 86.45 | 256.1098 | 537-42-8   | 14.91  |
| 84  | Xenognosin A                  | C16H16O3   | 86.45 | 256.1098 | 76907-79-4 | 14.91  |
| 85  | $\beta$ -Erythroidine         | C16H19NO3  | 86.45 | 273.1364 | 466-81-9   | 14.91  |
| 86  | 9(S)-HOTrE                    | C18H30O3   | 85.91 | 294.2193 | 89886-42-0 | 18.656 |
| 87  | 9-OxoODE                      | C18H30O3   | 85.91 | 294.2193 | 54232-59-6 | 18.656 |
| 88  | Colneleic acid                | C18H30O3   | 85.91 | 294.2193 |            | 18.656 |
| 89  | Juvenile hormone I            | C18H30O3   | 85.91 | 294.2193 | 13804-51-8 | 18.656 |
| 90  | 2-Hydroxypyridine             | C5H5NO     | 85.9  | 95.0375  | 142-08-5   | 1.147  |
| 91  | Alizarin                      | C14H8O4    | 85.55 | 240.042  | 72-48-0    | 10.912 |
| 92  | Danthron                      | C14H8O4    | 85.55 | 240.042  | 117-10-2   | 10.912 |
| 93  | 7,4'-Dihydroxyflavone         | C15H10O4   | 85.52 | 254.0581 |            | 12.019 |
| 94  | Alizarin 2-methyl ether       | C15H10O4   | 85.52 | 254.0581 | 08-11-03   | 12.019 |
| 95  | Anhydroglycinol               | C15H10O4   | 85.52 | 254.0581 |            | 12.019 |
| 96  | Chrysin                       | C15H10O4   | 85.52 | 254.0581 | 480-40-0   | 12.019 |
| 97  | Daidzein                      | C15H10O4   | 85.52 | 254.0581 | 486-66-8   | 12.019 |
| 98  | Hispidol                      | C15H10O4   | 85.52 | 254.0581 |            | 12.019 |
| 99  | Primetin                      | C15H10O4   | 85.52 | 254.0581 |            | 12.019 |
| 100 | Rubiadin                      | C15H10O4   | 85.52 | 254.0581 | 117-02-2   | 12.019 |
| 101 | (-)-Morphine                  | C17H19NO3  | 84.43 | 285.1363 |            | 15.27  |
| 102 | (S)-Coclaurine                | C17H19NO3  | 84.43 | 285.1363 | 486-39-5   | 15.27  |
| 103 | Cherylline                    | C17H19NO3  | 84.43 | 285.1363 | 23367-61-5 | 15.27  |
| 104 | Erysonine                     | C17H19NO3  | 84.43 | 285.1363 | 03-05-90   | 15.27  |
| 105 | Morphine                      | C17H19NO3  | 84.43 | 285.1363 | 57-27-2    | 15.27  |
| 106 | Narwedine                     | C17H19NO3  | 84.43 | 285.1363 | 510-77-0   | 15.27  |
| 107 | Norcodeine                    | C17H19NO3  | 84.43 | 285.1363 | 467-15-2   | 15.27  |
| 108 | Piperine                      | C17H19NO3  | 84.43 | 285.1363 | 94-62-2    | 15.27  |
| 109 | 11-Deoxylandomycinone         | C19H14O5   | 83.96 | 322.0857 |            | 11.878 |
| 110 | Tetrangomycin                 | C19 H14 O5 | 83.96 | 322.0857 | 08-08-51   | 11.878 |
| 111 | Isosamidin                    | C21H22O7   | 82.58 | 386.1368 | 53023-18-0 | 10.853 |
| 112 | Pteryxin                      | C21H22O7   | 82.58 | 386.1368 | 17944-23-9 | 10.853 |
| 113 | Samidin                       | C21H22O7   | 82.58 | 386.1368 | 477-33-8   | 10.853 |
| 114 | Chloroquine                   | C18H26ClN3 | 69.98 | 319.1817 | 54-05-7    | 9.115  |
